# Supplementary material
Source: publisher figshare collection journal article supplement (https://tandf.figshare.com/ndownloader/files/13677887)
Supplement: Supplementary file 1 [file 13677887]

**Supplementary Material**

**Use of principal components of UAV-acquired narrow-band multispectral imagery to map the diverse low stature vegetation fAPAR**

Cho-ying Huanga,b,*, Hsin-Lin Weia,c, Jiann-Yeou Raud, Jyun-Ping Jhand

a Department of Geography, National Taiwan University, Taipei, Taiwan

b Research Center for Future Earth, National Taiwan University, Taipei, Taiwan

c Department of Life Sciences, National Cheng Kung University, Tainan, Taiwan

d Department of Geomatics, National Cheng Kung University, Tainan, Taiwan

Corresponding author: Cho-ying Huang (e-mail: choying@ntu.edu.tw)

Address: 1 Sec. 4, Roosevelt Rd., Taipei, Taiwan 10617

Phone: +886-2-3366-3733; Fax: +886-2-2362-2911


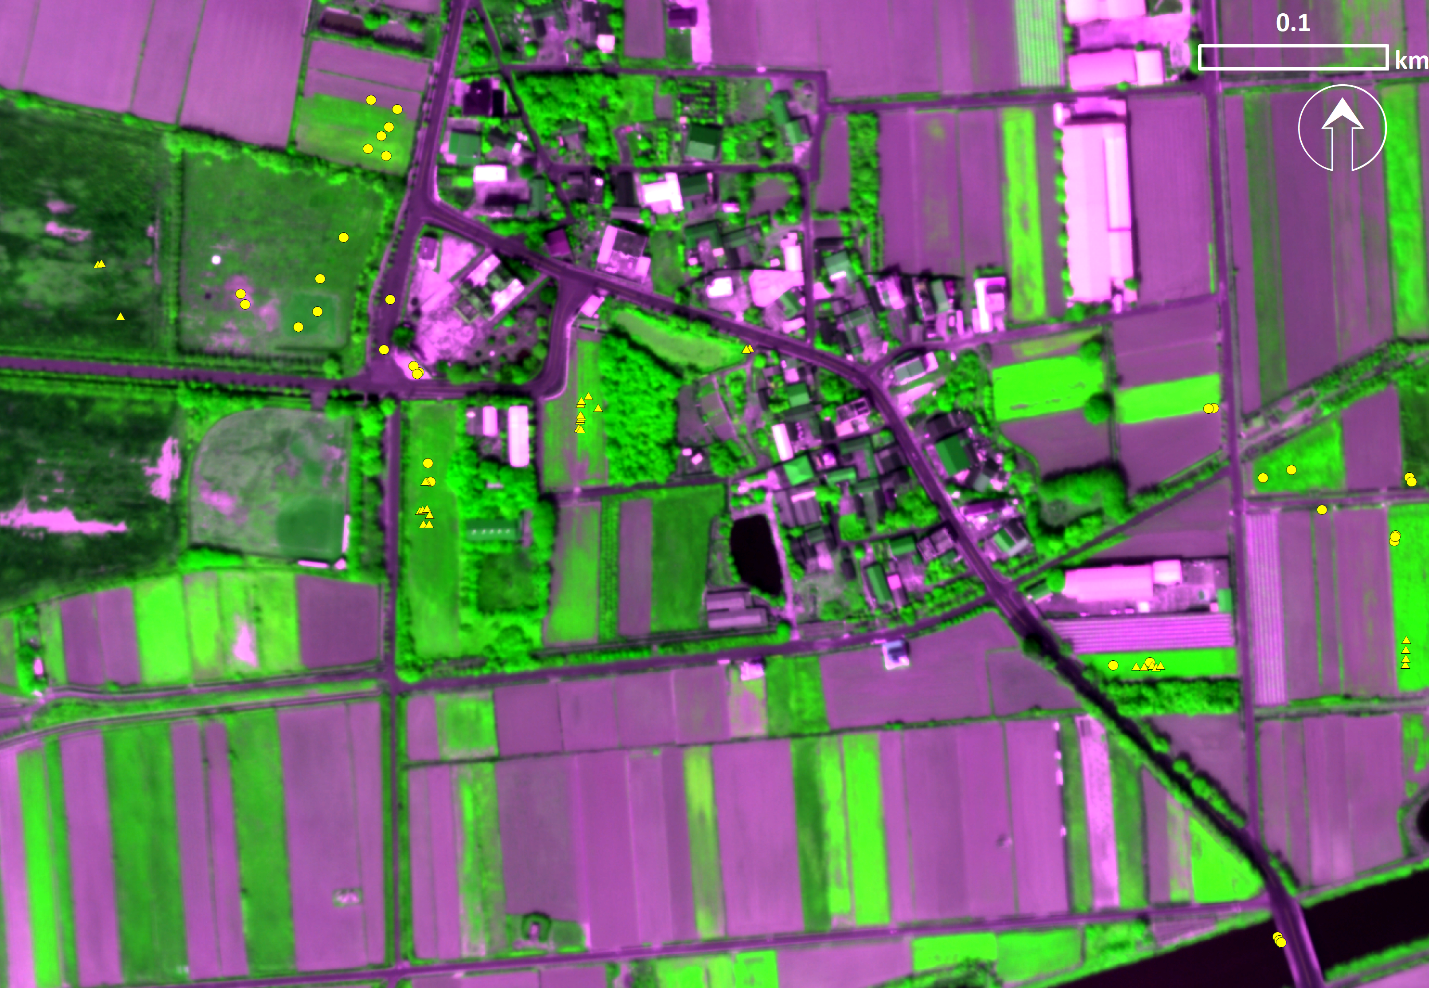


**Figure S1.** A close-up view of the spatial arrangement of field samples, and the yellow dots and triangles are sites with ground reflectance and fAPAR, respectively. The background is a 40 cm spatial resolution MiniMCA-12 imagery (red = 530 nm, green = 780 nm, blue = 510 nm).

**Band co-registration and orthorectification**

Conventionally, band co-registration is realized through image registration conducted by feature detection and matching, and image transformation and interpolation; the coefficients of a mathematical model for image transformation are estimated by feature-points matching within their overlapped area. However, this method may fail for narrow-band MiniMCA-12 imagery due to the inconsistent spectral responses among bands of a terrain object. Therefore, instead of image matching for image transformation coefficient calculation, we adopted a camera system calibration scheme for estimating the coefficients of the modified projective transformation (MPT), together with systematic errors correction for MiniMCA-12 band co-registration. In this scheme, the interior orientation parameters (IOPs) of each camera and the transformation parameters for MPT were initially estimated by an indoor camera calibration field. When applying the MiniMCA-12 UAV imagery, we analyzed the band misregistration residuals and performed systematic errors correction to update the MPT transformation parameters. Since all 12 bands of the MiniMCA-12 were co-registered, they had the same IOPs and exterior orientation parameters (EOPs). Thus, we can only select one band of MiniMCA-12 for aerial triangulation. To obtain accurate EOPs, the ground control points (GCPs) were marked (white painted on dark colored asphalt) during the aerial triangulation process (Figure S2). Ortho-rectification can thus be applied to all 12 bands using a 1 m spatial resolution digital surface model (DSM) generated by a Canon EOS 5D Mark II camera (Canon Inc., Tokyo, Japan) that was acquired along with a MiniMCA-12 (Jhan et al. 2016). The rectified image frames were then mosaicked (Pix4dMapper, Lausanne, Switzerland). Details of the procedures are described in Jhan et al. (2016) and are illustrated in Figure S3.

**Figure S2.** (a) The flight route and GCPs for the MiniMCA-12 data acquisition (adapted from Jhan et al., 2016 with permission from Elsevier B.V.); (b) the photograph illustration of GCP data acquisition taken by Jyun-Ping Jhan during the field campaign.

**Figure S3.** (a) MiniMCA-12 band-to-band registration and ortho-rectification. (b) The physical setting for conducting the MiniMCA-12 indoor calibration. Minimization of the image misregistration residuals (blue arrows) (c: the original image and d: the corrected image) using MPT (adapted from Jhan et al., 2016 with permission from Elsevier B.V.), displacement removal and lens distortion correction.

**Table S1.** Model fitness (*r*2) using MiniMCA-12 derived NDVI to estimate fAPAR. Values in the parentheses indicate the *p* values for the models.

|  |  | NIR | | |
| --- | --- | --- | --- | --- |
|  |  | 750 nm | 780 nm | 950 nm |
| Red | Linear fit |  |  |  |
| 650 nm | 0.07 (0.13) | 0.06 (0.16) | 0.03 (0.32) |
| 680 nm | 0.05 (0.20) | 0.04 (0.23) | 0.02 (0.43) |
| Curvilinear fit |  |  |  |
| 650 nm | 0.03 (0.32) | 0.03 (0.33) | 0.01 (0.59) |
| 680 nm | 0.02 (0.39) | 0.02 (0.41) | 0.01 (0.68) |

**References**

Asner, G. P. 1998. “Biophysical and Biochemical Sources of Variability in Canopy Reflectance.” *Remote Sensing of Environment* 64: 234–253.

Jhan, J.-P., J.-Y. Rau, and C. Huang. 2016. “Band-to-band Registration and Ortho-rectification of Multilens/multispectral Imagery: A Case Study of MiniMCA-12 Acquired by a Fixed-wing UAS.” *ISPRS Journal of Photogrammetry and Remote Sensing* 114: 66–77.
